# Supplementary material
Source: Research Square preprint supplement (doi:10.21203/rs.3.rs-9771182/v1)
Supplement: Supplementary file 1 [file 6fb03acb8650ab48b10f37cc.pdf]

## Additional file

**Table A. Sociodemographic and clinical characteristics for the subsample\* (n=386) at the first visit (T1).**

| Variable                             | Total<br>n = 386 | Acute<br>n = 69<br>(18%) | Post-Acute<br>n = 91<br>(24%) | Extended<br>n = 164<br>(42%) | Long-Term<br>n = 62<br>(16%) |
|--------------------------------------|------------------|--------------------------|-------------------------------|------------------------------|------------------------------|
| Age (years), median (P25-P75)        | 79 (72–84)       | 78 (73–84)               | 81 (73–86)                    | 77 (71–82)                   | 79 (72–84)                   |
| Sex: females, n (%)                  | 246 (64)         | 49 (71)                  | 57 (63)                       | 102 (62)                     | 38 (61)                      |
| Living alone, n (%)                  | 170 (44)         | 31 (45)                  | 46 (51)                       | 65 (40)                      | 28 (45)                      |
| Residence, n (%):                    |                  |                          |                               |                              |                              |
| Apartment                            | 197 (51)         | 32 (46)                  | 44 (48)                       | 95 (58)                      | 26 (42)                      |
| House                                | 179 (46)         | 36 (52)                  | 45 (49)                       | 65 (40)                      | 33 (53)                      |
| Others                               | 10 (3)           | 1 (2)                    | 2 (3)                         | 4 (2)                        | 3 (5)                        |
| Recruitment site, n (%):             |                  |                          |                               |                              |                              |
| Norway                               | 182 (47)         | 63 (91)                  | 26 (29)                       | 70 (43)                      | 23 (37)                      |
| Germany                              | 182 (47)         | 5 (7)                    | 64 (70)                       | 80 (49)                      | 33 (53)                      |
| France                               | 22 (6)           | 1 (1)                    | 1 (1)                         | 14 (9)                       | 6 (10)                       |
| Days since surgery, median (P25-P75) | 62 (24–140)      | 4 (3–5)                  | 28 (23–35)                    | 98 (65–134)                  | 332 (244–353)                |
| Fracture Type, n (%):                |                  |                          |                               |                              |                              |
| Femoral neck fracture                | 271 (70)         | 62 (90)                  | 60 (66)                       | 106 (65)                     | 43 (69)                      |
| Extracapsular fracture               | 115 (30)         | 7 (10)                   | 31 (34)                       | 58 (35)                      | 19 (31)                      |
| Use of walking aids, n (%):          |                  |                          |                               |                              |                              |
| Indoor                               | 193 (61)         | -                        | 83 (91)                       | 90 (55)                      | 20 (32)                      |
| Outdoor                              | 229 (72)         | -                        | 85 (93)                       | 113 (69)                     | 31 (50)                      |

\*The subsample includes only participants with clinical and DMO data at T1 and T2. Variables are shown for the total subsample and stratified by recovery phase groups. Recovery phase groups were stratified by the number of days from surgery to first visit: Acute ( $\leq 14$  days), Post-Acute (15-42 days), Extended (43-182 days), Long-Term (183-365 days).

**Table B. Clinical- and patient-reported outcomes for the subsample\* (n=386) at the first visit (T1).**

| Variable                                                       | Total<br>n = 386 | Acute<br>n = 69<br>(18%) | Post-Acute<br>n = 91<br>(24%) | Extended<br>n = 164<br>(42%) | Long-Term<br>n = 62<br>(16%) |
|----------------------------------------------------------------|------------------|--------------------------|-------------------------------|------------------------------|------------------------------|
| 6MinWT <sup>a</sup> distance (m), mean (SD)                    | 295 (126)        | - <sup>b</sup>           | 236 (107)                     | 312 (126)                    | 335 (126)                    |
| SPPB <sup>c</sup> total score [0-12], median (P25-P75)         | 6 (4–9)          | 3 (2–5) <sup>d</sup>     | 5.0 (4–8)                     | 8 (6–10)                     | 9 (6–11)                     |
| Gait speed (4MWT <sup>e</sup> ) (m/s), mean (SD)               | 0.71 (0.34)      | 0.37 (0.21)              | 0.65 (0.22)                   | 0.81 (0.32)                  | 0.92 (0.35)                  |
| TUG <sup>f</sup> (s), median (P25-P75)                         | 16 (11–23)       | - <sup>b</sup>           | 21 (15–31)                    | 15 (11–19)                   | 12 (10–20)                   |
| LLFDI-FC <sup>g</sup> [0-100], median (P25-P75)                | 51 (43–60)       | - <sup>b</sup>           | 44 (40–54)                    | 52 (47–60)                   | 60 (49–70)                   |
| WB step count (number per day) <sup>h</sup> , median (P25-P75) | 2216 (925–4740)  | 530 (271–1116)           | 1733 (709–3071)               | 3206 (1638–5898)             | 4452 (2178–7328)             |
| Systolic Blood Pressure (mmHg), mean (SD)                      | 135 (22)         | 134 (23)                 | 133 (18)                      | 135 (22)                     | 140 (22)                     |

\*The subsample includes only participants with clinical and DMO data at T1 and T2. The variables are shown for the total subsample and stratified by recovery phase groups. Recovery phase groups were stratified by the number of days from surgery to first visit: Acute ( $\leq 14$  days), Post-Acute (15-42 days), Extended (43-182 days), Long-Term (183-365 days).

<sup>a</sup> 6MinWT: 6-minute walk test

<sup>b</sup> Not applicable in the acute setting

<sup>c</sup> SPPB: Short Physical Performance Battery

<sup>d</sup> Due to the recency of the hip fracture surgery, acute patients did not perform the 5 chair-rise test of the SPPB and could therefore achieve a maximum of 8 points instead of 12

<sup>e</sup> 4MWT: 4-meter walk test

<sup>f</sup> TUG: Timed-Up and Go test

<sup>g</sup> LLFDI-FC: Late Life Function and Disability Instrument – Function Component – total score

<sup>h</sup> Weekly mean of daily sum of steps taken within all WBs

**Table C. Participants with a Walking Period at each assessment\*, overall and for each recovery phase group.**

| Walking Period   | Assessment | Group      | Participants having the Walking Period |    | Number of Walking Periods per valid day, Median (P25-P75) |
|------------------|------------|------------|----------------------------------------|----|-----------------------------------------------------------|
|                  |            |            | n                                      | %  |                                                           |
| WBs >30s         | T1         | Total      | 449                                    | 89 | 1.0 (0.3–2.0)                                             |
|                  |            | Acute      | 69                                     | 70 | 0.2 (0.0–0.6)                                             |
|                  |            | Post-Acute | 110                                    | 93 | 1.0 (0.4–1.7)                                             |
|                  |            | Extended   | 188                                    | 94 | 1.3 (0.5–2.6)                                             |
|                  |            | Long-Term  | 82                                     | 93 | 1.5 (0.6–3.1)                                             |
|                  | T2         | Total      | 351                                    | 91 | 1.6 (0.7–2.7)                                             |
|                  |            | Acute      | 64                                     | 93 | 1.6 (0.6–2.4)                                             |
|                  |            | Post-Acute | 78                                     | 86 | 1.4 (0.5–2.8)                                             |
|                  |            | Extended   | 150                                    | 91 | 1.7 (0.7–2.9)                                             |
|                  |            | Long-Term  | 59                                     | 95 | 1.5 (0.9–2.4)                                             |
|                  | T3         | Total      | 220                                    | 90 | 1.6 (0.7–2.6)                                             |
|                  |            | Acute      | 53                                     | 98 | 1.8 (1.1–2.3)                                             |
|                  |            | Post-Acute | 42                                     | 75 | 1.0 (0.1–2.1)                                             |
|                  |            | Extended   | 82                                     | 93 | 1.7 (1.0–3.0)                                             |
|                  |            | Long-Term  | 43                                     | 91 | 1.6 (0.9–2.4)                                             |
| Walking Clusters | T1         | Total      | 421                                    | 83 | 1.3 (0.3–2.6)                                             |
|                  |            | Acute      | 62                                     | 63 | 0.3 (0.0–0.8)                                             |
|                  |            | Post-Acute | 102                                    | 86 | 1.3 (0.6–2.5)                                             |
|                  |            | Extended   | 177                                    | 88 | 1.7 (0.6–2.9)                                             |
|                  |            | Long-Term  | 80                                     | 91 | 2.0 (0.7–3.4)                                             |
|                  | T2         | Total      | 345                                    | 89 | 2.0 (0.9–3.4)                                             |
|                  |            | Acute      | 63                                     | 91 | 1.9 (0.9–2.9)                                             |
|                  |            | Post-Acute | 78                                     | 86 | 1.9 (0.6–3.4)                                             |
|                  |            | Extended   | 146                                    | 89 | 2.1 (0.9–3.6)                                             |
|                  |            | Long-Term  | 58                                     | 94 | 2.1 (1.1–3.4)                                             |
|                  | T3         | Total      | 210                                    | 86 | 2.0 (1.0–3.4)                                             |
|                  |            | Acute      | 52                                     | 96 | 2.3 (1.4–3.3)                                             |
|                  |            | Post-Acute | 40                                     | 71 | 1.4 (0.0–2.5)                                             |
|                  |            | Extended   | 78                                     | 89 | 2.0 (1.0–4.0)                                             |
|                  |            | Long-Term  | 40                                     | 85 | 1.8 (1.1–3.0)                                             |

\*Three assessments: The first visit (T1, N = 505), 6-month (T2, n = 386) and 12-month follow-up (T3, n = 245). Recovery phase groups were stratified by the number of days from surgery to first visit: Acute ( $\leq 14$  days), Post-Acute (15–42 days), Extended (43–182 days), Long-Term (183–365 days).

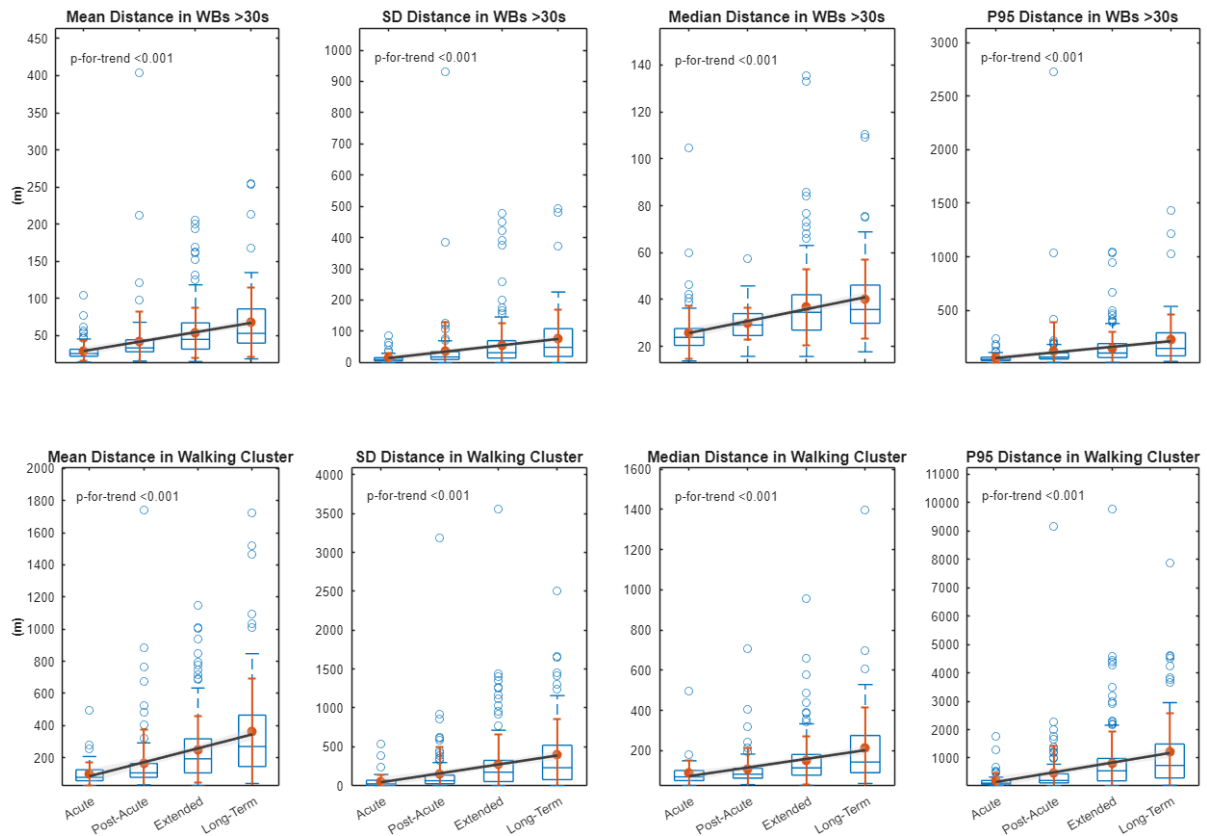

**Figure A.** Known-groups validity of Walking Period Distance DMOs between the four hip fracture recovery phase groups.

**Table D.** Real-world Walking Period Distances at the first visit (T1) stratified by recovery phase group (N=505).

| DMO                             | Acute<br>n = 99<br>(20%) | Post-Acute<br>n = 118<br>(23%) | Extended<br>n = 200<br>(40%) | Long-Term<br>n = 88<br>(17%) |
|---------------------------------|--------------------------|--------------------------------|------------------------------|------------------------------|
| Distance in WBs >30s (m)        |                          |                                |                              |                              |
| Mean                            | 26 (22–32)               | 34 (28–45)                     | 45 (32–67)                   | 53 (40–86)                   |
| SD                              | 9 (5–16)                 | 18 (10–35)                     | 31 (14–70)                   | 49 (19–108)                  |
| Median                          | 24 (20–28)               | 29 (25–34)                     | 35 (27–42)                   | 36 (30–46)                   |
| P95                             | 43 (32–63)               | 64 (47–103)                    | 102 (61–190)                 | 146 (76–291)                 |
| Distance in Walking Cluster (m) |                          |                                |                              |                              |
| Mean                            | 78 (57–125)              | 105 (78–164)                   | 193 (105–318)                | 269 (145–465)                |
| SD                              | 23 (1–69)                | 63 (25–134)                    | 174 (52–325)                 | 231 (78–520)                 |
| Median                          | 70 (51–101)              | 83 (63–112)                    | 114 (78–181)                 | 144 (90–275)                 |
| P95                             | 112 (68–207)             | 208 (123–443)                  | 549 (196–983)                | 738 (297–1492)               |

Values are shown as median (P25–P75). Recovery phase groups were stratified by the number of days from surgery to first visit: Acute ( $\leq 14$  days), Post-Acute (15–42 days), Extended (43–182 days), Long-Term (183–365 days).
